# Supplementary material for: New evidence of alternative migration patterns for two Mediterranean potamodromous species
Source: PubMed Central journal article supplement — Sci Rep. 2024 Oct 13;14:23910. doi: 10.1038/s41598-024-74959-4 (PMC11471790; doi:10.1038/s41598-024-74959-4), 2024-10-13
Supplement: 41598_2024_74959_MOESM1_ESM.pdf [file 41598_2024_74959_MOESM1_ESM.pdf]

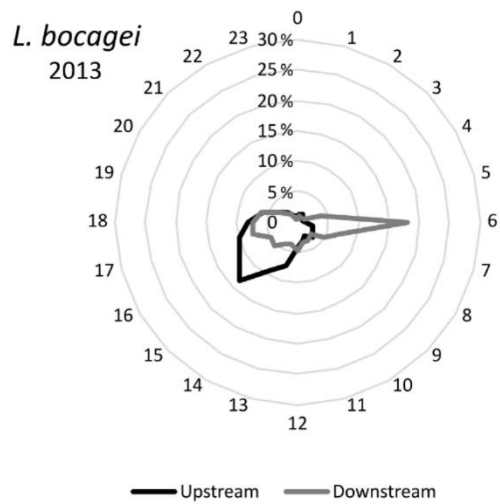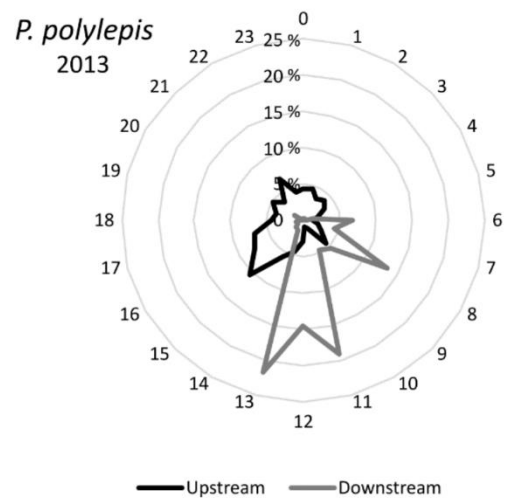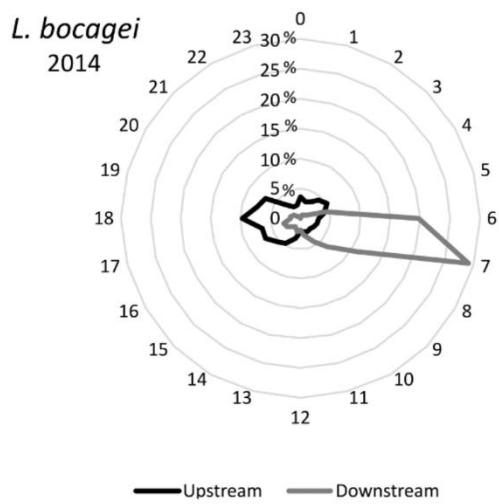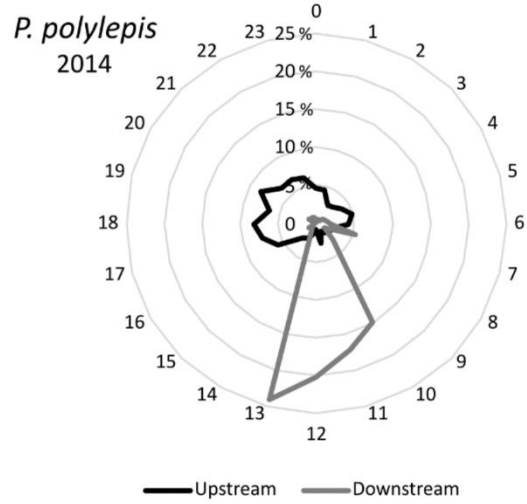

**Supplementary material 1** – Circadian rhythm of downstream and upstream Iberian barbel (left column) and Iberian nase (right column) movements recorded for the two study years separately (2013 and 2014) at the Coimbra dam FPS.
